# Supplementary material for: Green and facile synthesis of Fe3O4 and graphene nanocomposites with enhanced rate capability and cycling stability for lithium ion batteries
Source: Royal Society of Chemistry journal article supplement (doi:10.1039/c5ta03690a), 2015-01-01
Supplement: c5ta03690a1.pdf [file c5ta03690a1.pdf]

Electronic Supplementary Information (ESI) for

Green and facile synthesis of Fe<sub>3</sub>O<sub>4</sub> and graphene nanocomposites with  
enhanced rate capability and cycling stability for lithium ion batteries

Yucheng Dong,<sup>a,b</sup> Zhenyu Zhang,<sup>a</sup> Yang Xia,<sup>a</sup> Ying-San Chui,<sup>a</sup> Jong-Min Lee,<sup>b\*</sup> Juan

Antonio Zapien<sup>a\*</sup>

<sup>a</sup> *Center of super-Diamond and Advanced Films (COSDAF), City University of  
Hong Kong, 83 Tat Chee Avenue, Hong Kong SAR, PR China*

<sup>b</sup> *School of Chemical & Biomedical Engineering, Nanyang Technological  
University, 62 Nanyang Drive, Singapore*

*E-mail:* [jmlee@ntu.edu.sg](mailto:jmlee@ntu.edu.sg), [apjazzs@cityu.edu.hk](mailto:apjazzs@cityu.edu.hk)

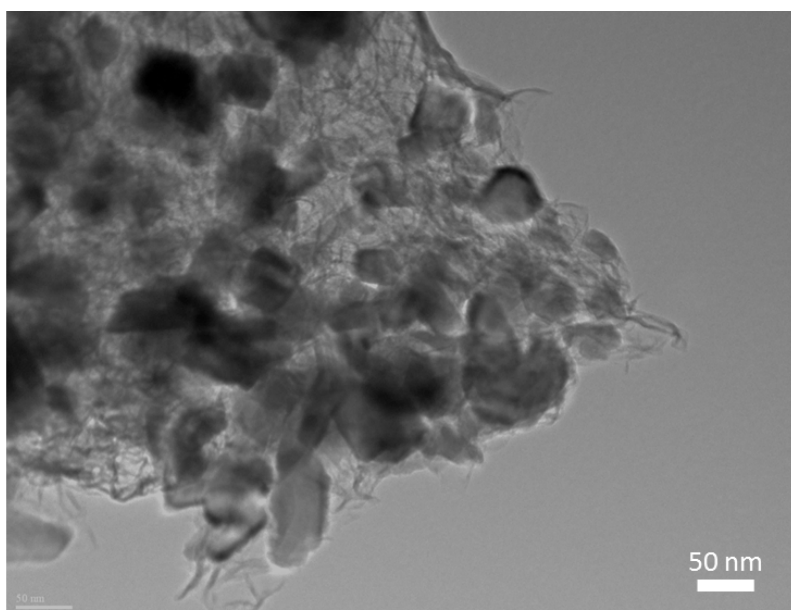

Figure S1. TEM image of  $\text{Fe}_3\text{O}_4/\text{G}$  nanocomposites.

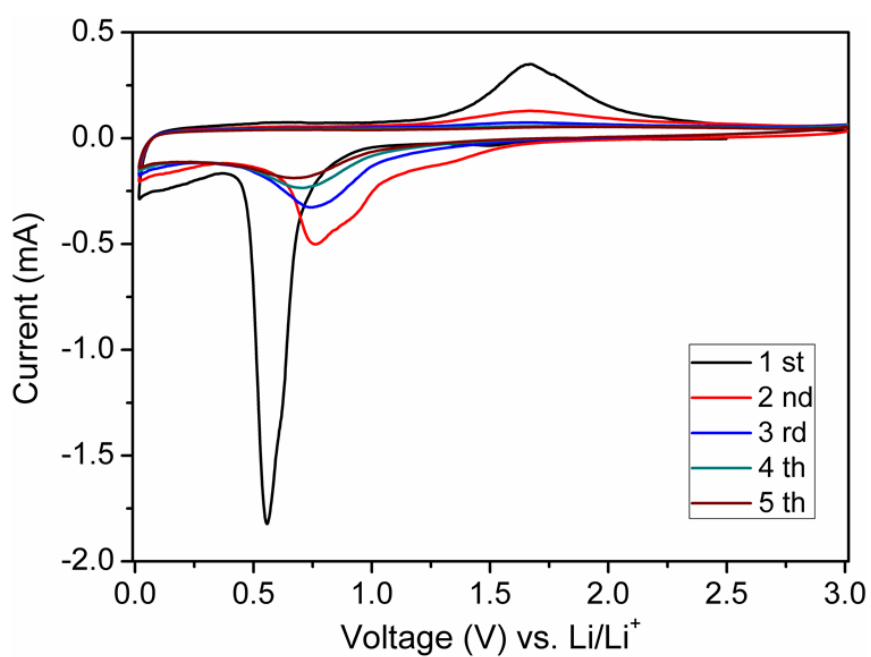

Figure S2. Cyclic voltammograms characteristics of  $\text{Fe}_3\text{O}_4$  electrode for the first five cycles in a voltage range of 0.01-3.0 V at a scanning rate of  $0.2 \text{ mV s}^{-1}$ .

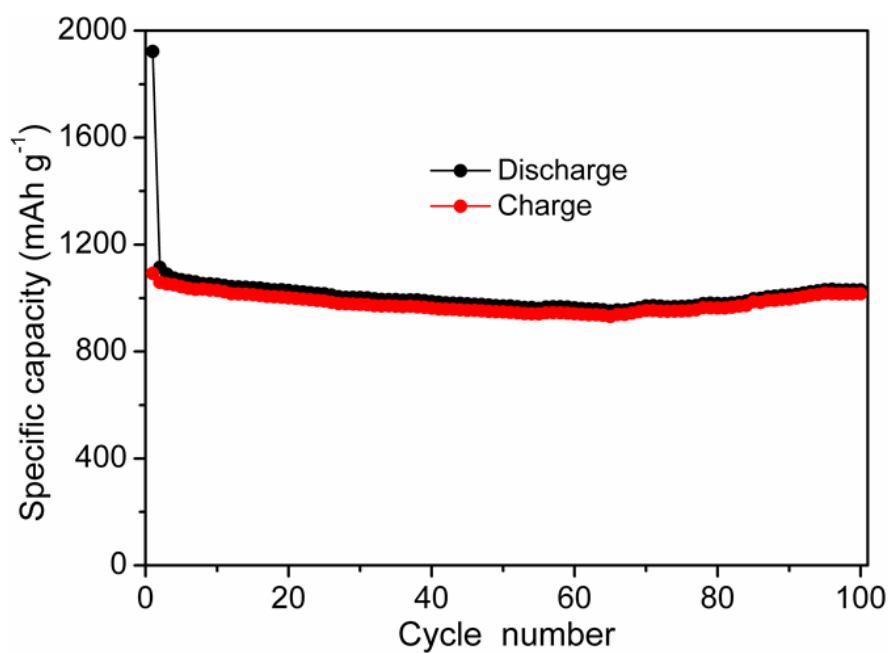

Figure S3. Cycling performance of  $\text{Fe}_3\text{O}_4/\text{G-2}$  nanocomposites at a current density of  $200 \text{ mA g}^{-1}$  and for 100 cycles.

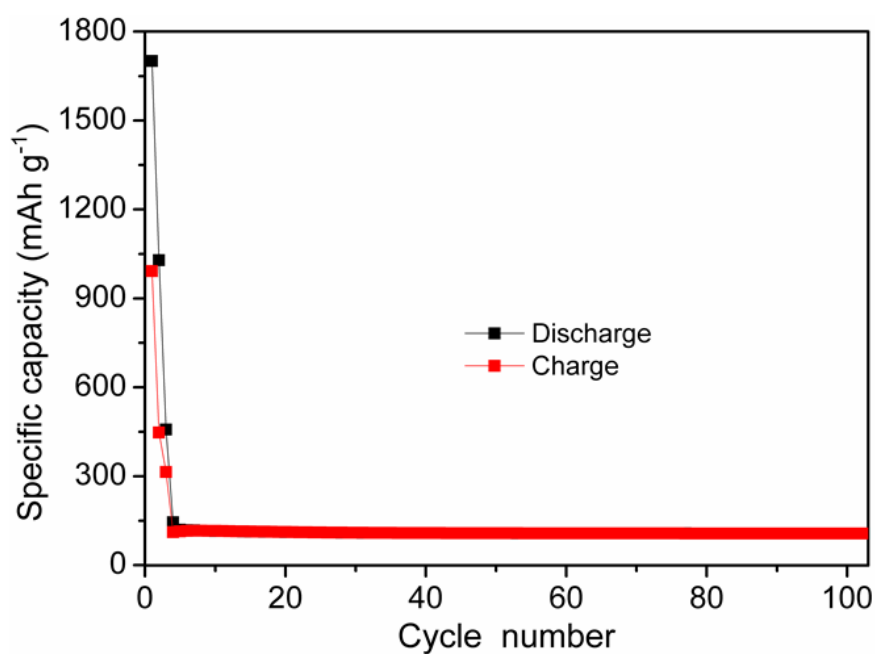

Figure S4. Cycling performance of pure  $\text{Fe}_3\text{O}_4$  nanoparticles at a current density of  $1000 \text{ mA g}^{-1}$  and for 100 cycles after activation for three cycles at  $200 \text{ mA g}^{-1}$ .
